# Supplementary material for: De-bundled single-walled carbon nanotube-modified sensors for simultaneous differential pulse voltammetric determination of ascorbic acid, dopamine, and uric acid
Source: Royal Society of Chemistry journal article supplement (doi:10.1039/c7nj04371f), 2018-01-01
Supplement: c7nj04371f1.pdf [file c7nj04371f1.pdf]

## Electronic Supporting Information

### **De-bundled single-walled carbon nanotube-modified sensors for simultaneous differential pulse voltammetric determination of ascorbic acid, dopamine, and uric acid**

Dinakaran Thirumalai<sup>a</sup>, Devaraju Subramani<sup>b</sup>, Jang-Hee Yoon<sup>c</sup>, Jaewon Lee<sup>d</sup>,  
Hyun-jong Paik<sup>b</sup> and Seung-Cheol Chang<sup>e,\*</sup>

<sup>a</sup>*Graduate Department of Chemical Materials, Pusan National University, Busan 46241, Republic of Korea.*

<sup>b</sup>*Department of Polymer Science and Engineering, Pusan National University, Busan 46241, Republic of Korea.*

<sup>c</sup>*Busan Center, Korea Basic Science Institute, Busan 46742, Republic of Korea*

<sup>d</sup>*College of Pharmacy, Molecular Inflammation Research Center for Aging Intervention, Pusan National University, Busan 46241, Republic of Korea*

<sup>e</sup>*Institute of Bio-Physio Sensor Technology, Pusan National University, Busan 46241, Republic of Korea. E-mail: s.c.chang@pusan.ac.kr*

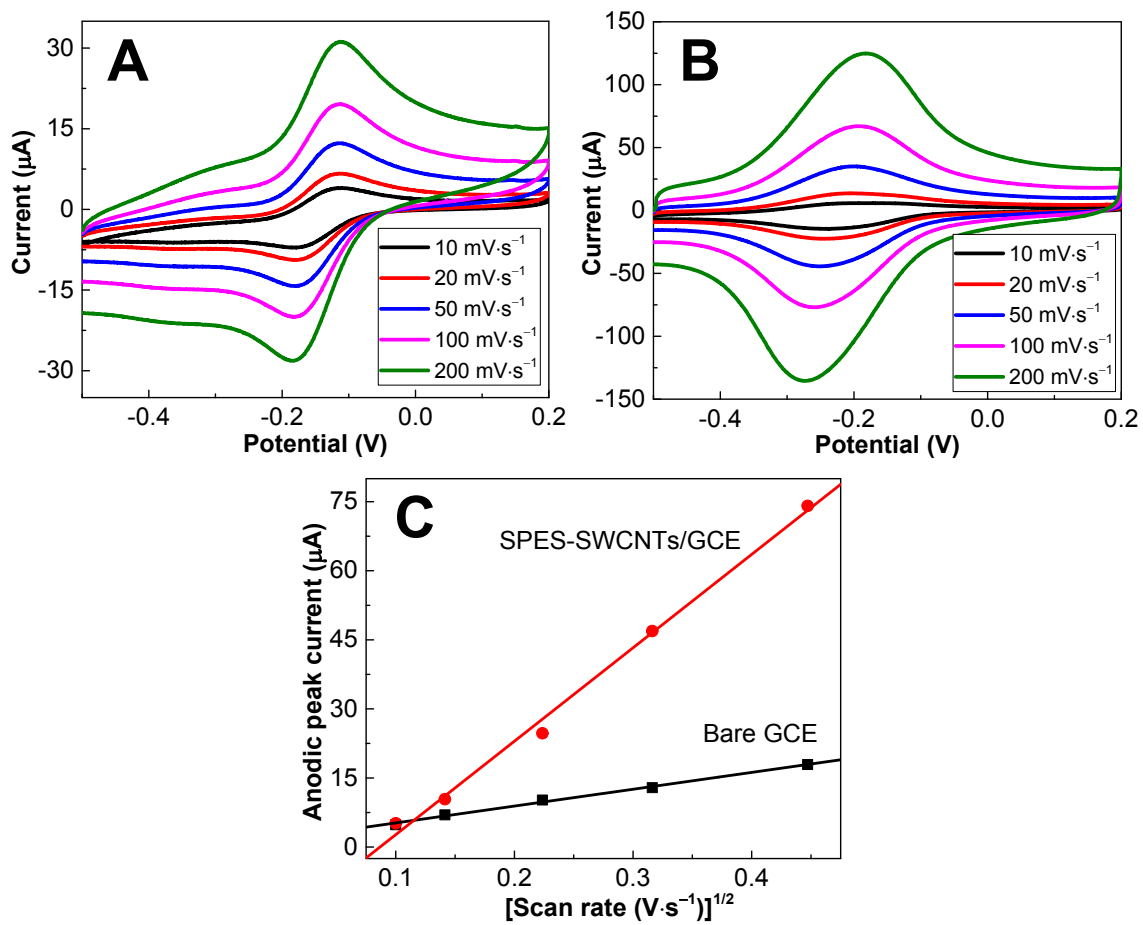

**Fig. S1** CVs of (A) bare GCE and (B) SPES-SWCNTs/GCE in 1 mM  $[\text{Ru}(\text{NH}_3)_6]\text{Cl}_3$  prepared in 0.1 M KCl at different scan rates, (C) the corresponding anodic peak current vs. square root of scan rates plot.

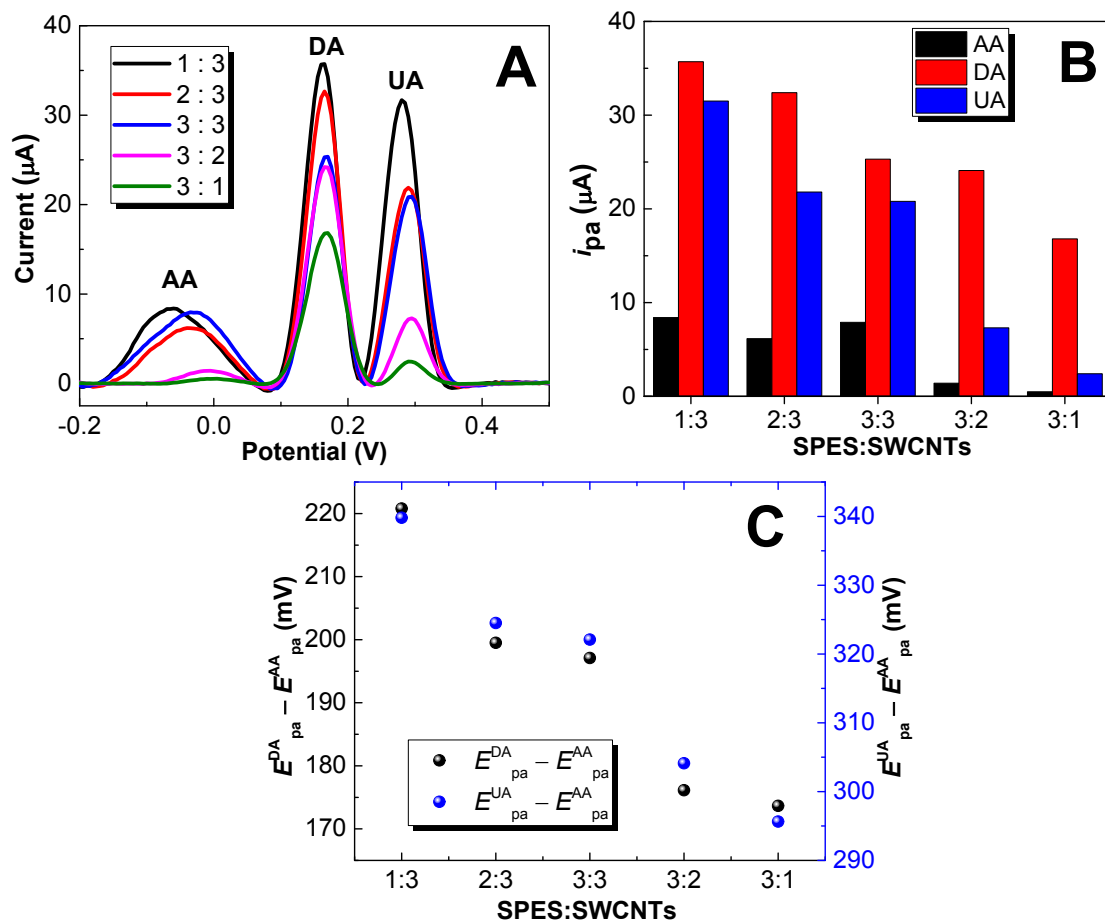

**Fig. S2** DPVs of (A) different ratio of SPES and SWCNTs modified GCE in 1.0 mM AA, 100  $\mu\text{M}$  DA and 100  $\mu\text{M}$  UA prepared in 0.1 M PBS (pH 7.0). (B) The corresponding  $i_{pa}$  plot and (C)  $\Delta E_{pa}$  plot.

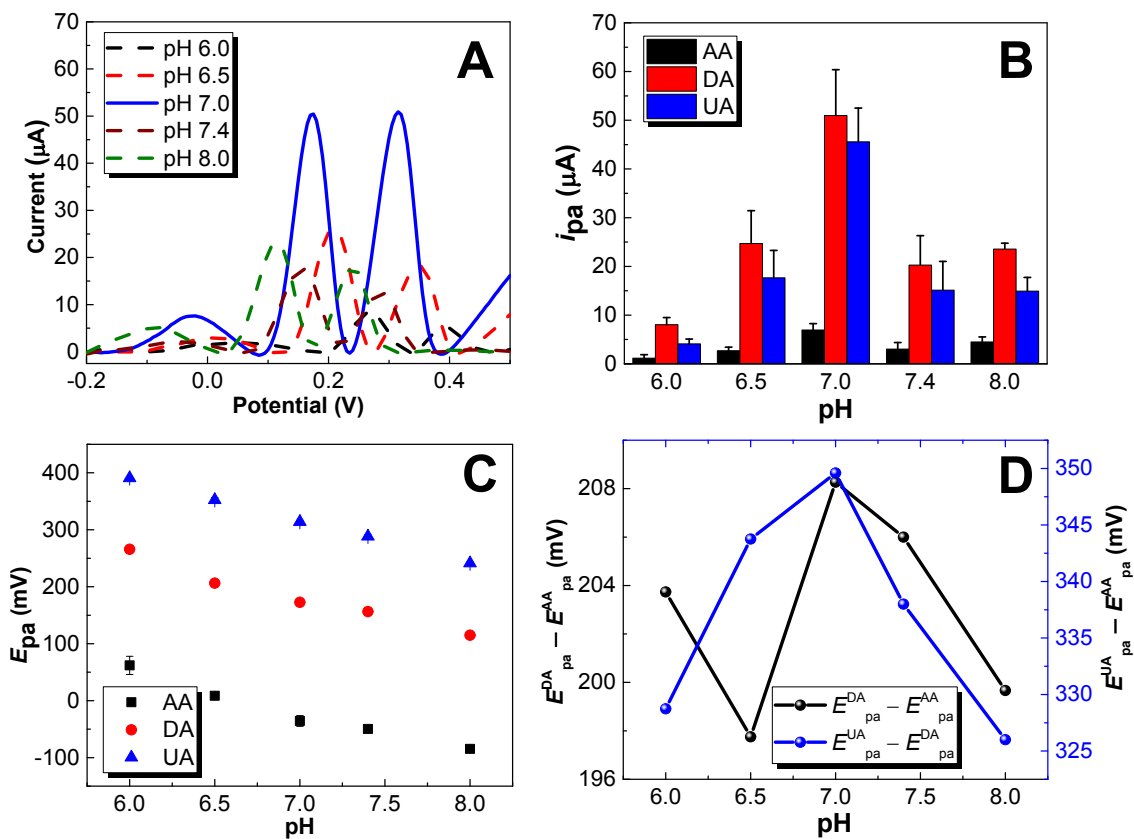

**Fig. S3** DPVs of (A) SPES–SWCNTs/GCE in 0.1 M PBS with different pH values containing 1.0 mM AA, 100  $\mu$ M DA and 100  $\mu$ M UA. (B) The corresponding plots of  $i_{pa}$  vs. pH, (C)  $E_{pa}$  vs. pH and (D)  $\Delta E_{pa}$  vs. pH.

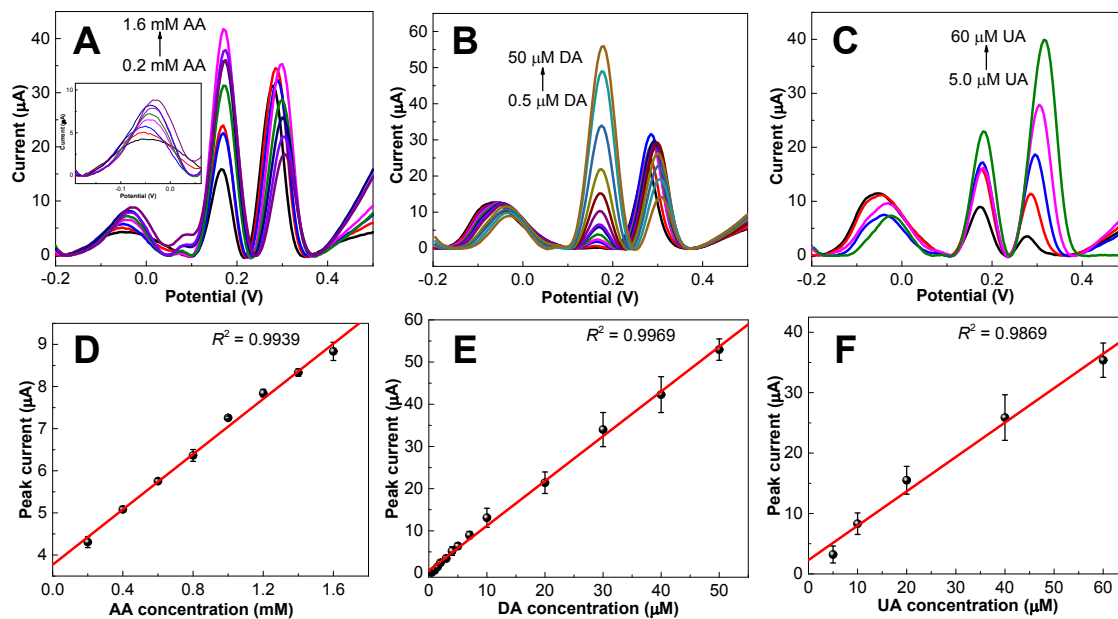

**Fig. S4** DPVs of SPES–SWCNTs/GCE in (A) 0.2 mM to 1.6 mM AA in the presence of 10 μM DA and 25 μM UA, (B) 0.5 μM to 50 μM DA in the presence of 2.0 mM AA and 25 μM UA, and (C) 5.0 μM to 60 μM UA in the presence of 2.0 mM AA and 10 μM DA prepared in 0.1 M PBS (pH 7.0).

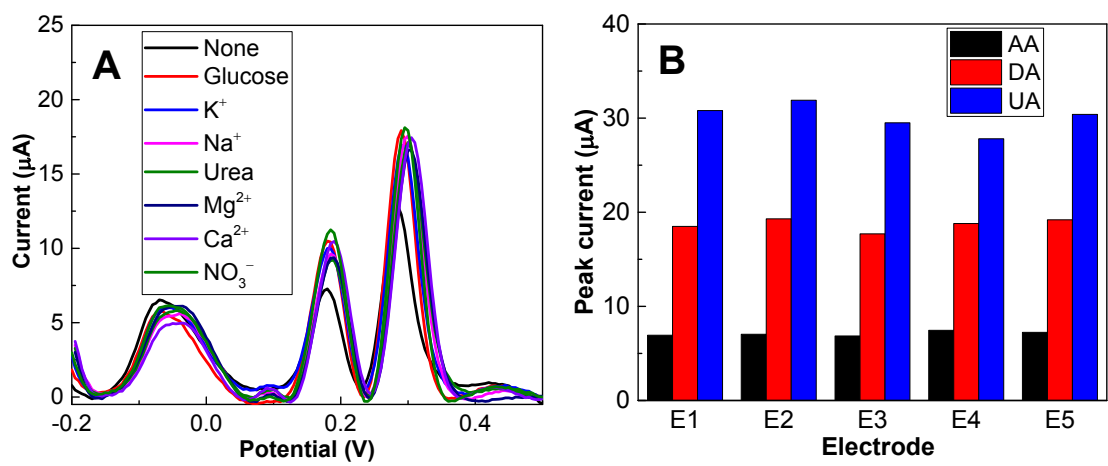

**Fig. S5** Interference study of (A) SPES-SWCNTs/GCE in 0.4 mM AA, 5.0 µM DA and 10 µM UA in addition of some interfering compounds and ions: glucose, KCl, NaCl, urea, MgCl<sub>2</sub>, CaCl<sub>2</sub> and NaNO<sub>3</sub> (each concentration = 0.4 mM). Reproducibility of (B) SPES-SWCNTs/GCE in 0.8 mM AA, 20 µM DA and 40 µM UA.
